# Supplementary material for: Glia-neuron coupling via a bipartite sialylation pathway promotes neural transmission and stress tolerance in Drosophila
Source: eLife. 2023 Mar 22;12:e78280. doi: 10.7554/eLife.78280 (PMC10110239; doi:10.7554/eLife.78280)
Supplement: Figure 2—figure supplement 1—source data 1. [file elife-78280-fig2-figsupp1-data1.xlsx]

## Sheet: Fig 2-fig sup 1
Fig 2 - fig supplement 1 Source data
	Onset of paralysis, sec
Fly #	WT	CSAS21/21	BAC-CSAS CSAS21/21
1	876	429	964
2	1270	317	932
3	1481	461	963
4	1099	262	952
5	1310	155	980
6	1234	223	902
7	1770	492	1140
8	1033	226	792
9	1603	234	1133
10	1500	319	1165
11	894	195	1077
12	1180	316	955
13	1471		899
14	1381		781
15	1149		1373
16	1062		707
17	1103		1542
18	1136		1088
19	1329		1226
20	941		1625
21	1217		1073
22			1915
23			1003
24			1481
25			1582
26			1590
27			1030
28			1282
29			1276
30			1628
31			1340
32			2215
