# Supplementary material for: Glia-neuron coupling via a bipartite sialylation pathway promotes neural transmission and stress tolerance in Drosophila
Source: eLife. 2023 Mar 22;12:e78280. doi: 10.7554/eLife.78280 (PMC10110239; doi:10.7554/eLife.78280)
Supplement: Figure 2—figure supplement 2—source data 1. [file elife-78280-fig2-figsupp2-data1.xlsx]

## Sheet: Fig 2-fig sup 2
Fig 2 - fig supplement 2 Source data
	Onset of paralysis, sec
Fly #	WT	CSAS>FLP_>CSAS CSASMi/Mi	CSAS>_ AyGal4> CSAS CSASMi/Mi	CSAS>FLP AyGal4> CSAS CSASMi/Mi
1	900	314	579	2326
2	1325	660	624	2400
3	984	469	510	2464
4	1110	617	348	2271
5	1264	611	707	1202
6	1269	499	809	2984
7	1200	744	627	1666
8	961	672	389	1806
9	2406	614	630	2006
10	1371	561	788	2070
11	1620	632	840	2006
12	1687	627	660	2095
13	1815	543	392	2192
14	1348	662	901	2283
15	1658	886	662	2700
16	1766	536	711	2400
17	1858	739	690	2000
18	1865	752	570	2335
19	1397	429	599	2437
20	1783	594	750	1358
21	2681		772	1454
22	1540		551
23	2451
24	1863
25	2414
26	1552
