# Supplementary material for: Glia-neuron coupling via a bipartite sialylation pathway promotes neural transmission and stress tolerance in Drosophila
Source: eLife. 2023 Mar 22;12:e78280. doi: 10.7554/eLife.78280 (PMC10110239; doi:10.7554/eLife.78280)
Supplement: Figure 3—figure supplement 1—source data 1. [file elife-78280-fig3-figsupp1-data1.xlsx]

## Sheet: Fig.3 -fig supp 1A
Figure 3 - figure supplement 1A Source data
	Onset of TS paralysis, sec
Fly #	WT	CSAS21/21	CSASMi/21	_>CSAS CSASMi/21	Repo>_ CSAS21/21	Gli>_ CSAS21/21	Mz709>_ CSASMi/21	dEAAT1>_ CSASMi/21	R85G01>_ CSASMi/21	C155>_ CSAS21/21	Mj85b>_ CSAS21/21	1407>_ CSAS21/21
1	900	444	138	218	192	255	187	776	563	317	207	385
2	1325	506	178	253	217	392	379	385	630	320	91	200
3	984	546	355	371	247	488	414	873	620	42	116	331
4	1110	569	185	193	74	385	246	837	269	497	76	306
5	1264	342	469	223	309	354	426	175	537	371	105	372
6	1269	376	69	491	289	338	188	250	187	356	173	515
7	1200	530	600	223	248	323	163	175	648	494	178	311
8	961	468	518	201	55	275	129	224	488	227	162	379
9	2406	445	488	316	33	527	143	251	492	88	127	413
10	1371	308	403	164	148	147	206	148	410	448	107	225
11	1620	534	645	123	342	90	276	298	567	318	236	358
12	1687	313	304	395	342	236	276	225	295	31	148	225
13	1815	373	328	57	448	147	230	277	329	214	287	371
14	1348	421	589	83	440	226	373	302	242	117	191	241
15	1658	377	528	138	407	187	308	80	434	313	93	372
16	1766	425	82	150	315	237	160	89	570	145	161	306
17	1858	389	302	120	235	59	154	262	290	309	156	338
18	1865	258	156	434	230	326	236	81	460	277	266	402
19	1397	505	84	374	235	260	267	159	410	364	278	158
20	1783	571	591	179	315	192	273	371	176	639	302	292
21	2681	513	207	428			142	126	365	46	295	200
22	1540	316					113		620		165	454
23	2451	433							357		175
24	1863								423		170
25	2414								375		156
26	1552								405		101
27									390
28									440
29									600

## Sheet: Fig.3-fig supp 1B
Figure 3 - figure supplement 1B Source data
Fly #	WT	_>CSAS CSAS[Mi/21]	R56F03>_ CSAS[Mi/21]	R56F03>CSAS CSAS[Mi/21]
1	900	218	630	1152
2	1325	253	560	1144
3	984	371	610	1145
4	1110	193	945	1608
5	1264	223	659	1393
6	1269	491	910	1215
7	1200	223	660	1330
8	961	201	385	1645
9	2406	316	738	1452
10	1371	164	802	1601
11	1620	123	566	1340
12	1687	395	720	1288
13	1815	57	740	1405
14	1348	83	363	1314
15	1658	138	715	1624
16	1766	150	501	1470
17	1858	120	465	1365
18	1865	434	470	1902
19	1397	374	420	1959
20	1783	179	595	1600
21	2681	428	855	1291
22	1540		730
23	2451		479
24	1863		980
25	2414		585
26	1552		994
27			750
28			610
29			769
30			681
31			840
32			855
