# Supplementary material for: Glia-neuron coupling via a bipartite sialylation pathway promotes neural transmission and stress tolerance in Drosophila
Source: eLife. 2023 Mar 22;12:e78280. doi: 10.7554/eLife.78280 (PMC10110239; doi:10.7554/eLife.78280)
Supplement: Figure 3—source data 1. [file elife-78280-fig3-data1.xlsx]

## Sheet: fig. 2A
Figure 3A Source data
	Onset of paralysis at 38C, sec
Fly #	WT	CSAS21/21	CSASMi/21	Repo>CSAS CSAS21/21	Gli>CSAS CSAS21/21	Mz709>CSAS CSAS21/21	dEAAT1>CSAS CSASMi/21	R85G01>CSAS CSASMi/21	C155>CSAS CSAS21/21	Mj85b>CSAS CSAS21/21	1407>CSAS CSAS21/21	R56F03>CSAS CSASMi/21
1	900	444	138	1287	1771	1594	1587	458	381	352	276	1152
2	1325	506	178	1132	823	1521	1272	640	234	370	325	1144
3	984	546	355	993	1506	1703	1375	920	288	547	265	1145
4	1110	569	185	1204	1259	1635	2344	396	432	422	391	1608
5	1264	342	469	1156	1237	1483	2109	578	238	559	386	1393
6	1269	376	69	1163	1125	1406	1304	747	250	370	206	1215
7	1200	530	600	1585	1036	1820	1757	1155	280	320	383	1330
8	961	468	518	922	1362	1620	1530	863	165	364	337	1645
9	2406	445	488	1425	1060	1613	1080	570	410	529	398	1452
10	1371	308	403	1212	1174	1709	1588	618	387	534	247	1601
11	1620	534	645	1594	1156	1669	1249	781	414	535	315	1340
12	1687	313	304	1132	1420	1436	1806	770	302	380	501	1288
13	1815	373	328	1088	1560	1294	1592	1463	229	366	363	1405
14	1348	421	589	1245	1503	1313	1114	898	415	452	303	1314
15	1658	377	528	1121	1191	1057	2144	1048	436	381	402	1624
16	1766	425	82	1285	1778	1448	1528	943	245	261	379	1470
17	1858	389	302	1044	1740	1946	1517	1057	202	477	229	1365
18	1865	258	156	1200	1371	1763	1537	885	194	374	68	1902
19	1397	505	84	1250	1765	1075	1457	1058	111	322	250	1959
20	1783	571	591	1399	1750	1903	1390	745	284	347		1600
21	2681	513	207		1560	1637		857	259	430		1291
22	1540	316			1566				262	359
23	2451	433			1577				266	352
24	1863				1366				271	383
25	2414				1659				369	394
26	1552				1446				328	386
27					1881				266	317
28					1869				391	353
29					1166				362	209
30					1204				348	335
31					1353				245	339
32					1731				271	305
33					1343				200
34					1235				155
35					1481				212
36					1786				163
37					1658				234
38					1202
