# Supplementary material for: Glia-neuron coupling via a bipartite sialylation pathway promotes neural transmission and stress tolerance in Drosophila
Source: eLife. 2023 Mar 22;12:e78280. doi: 10.7554/eLife.78280 (PMC10110239; doi:10.7554/eLife.78280)
Supplement: Figure 3—source data 2. [file elife-78280-fig3-data2.xlsx]

## Sheet: Righting Assay Data
Righting assay, sec
Genotype	CSAS[Mi/21]					_>CSAS CSAS[Mi/21]					C155> CSAS[Mi/21]					Repo> CSAS[Mi/21]					C155>CSAS CSAS[Mi/21]					Repo> CSAS CSAS[Mi/21]					WT
Animal #	TRIAL 1	TRIAL 2	MEAN		Animal #	TRIAL 1	TRIAL 2	MEAN		Animal #	TRIAL 1	TRIAL 2	MEAN		Animal #	TRIAL 1	TRIAL 2	MEAN		Animal #	TRIAL 1	TRIAL 2	MEAN		Animal #	TRIAL 1	TRIAL 2	MEAN		Animal #	TRIAL 1	TRIAL 2	MEAN
1		1.07	1.07		1	3	3.15	3.075		1	7.22	1.78	4.5		1	4.29	0.87	2.58		1	1	1	1		1	1		1		1	0.64	1.32	0.98
2	2.69	1.06	1.875		2	2.07	1.14	1.605		2	7.88	3.34	5.61		2	3.21	4.28	3.745		2	1	4	2.5		2	1	1	1		2		0.38	0.38
3	8.67		8.67		3	2.87	4.52	3.695		3	4.12		4.12		3	0.91	6.6	3.755		3	2	1	1.5		3	0.26	0.53	0.4		3		0.39	0.39
4	2.72		2.72		4		4.93	4.93		4	4.45		4.45		4	6.43	8.34	7.385		4	4	5	4.5		4	1	1.11	1.055		4	0.66		0.66
5	2.03	4.12	3.075		5	5		5		5	3	1	2		5	3.16	4.87	4.015		5	1	11	6		5	0.31	0.32	0.32		5		0.78	0.78
6	3.28	0.93	2.105		6		1	1		6	9.71	2.72	6.215		6	4.49		4.49		6	1	1	1		6		2	2		6	1.16		1.16
7	3.9	1.48	2.69		7	1.51	1.58	1.545		7		1.05	1.05		7	3.6		3.6		7	7	1	4		7	0.28	0.35	0.3		7	0.56	1.02	0.79
8	2.04	2.38	2.21		8	6.12		6.12		8	1.89		1.89		8	0.79	2.7	1.745		8	1	3	2		8	1	1	1		8		1.97	1.97
9	1.33	1.3	1.315		9	2.17	1.91	2.04		9	0.49	6.2	3.345		9	2.34	6.41	4.375		9	5	1	3		9		1	1		9	0.26	0.63	0.45
10	2.9	15	8.95		10	6.17	5.5	5.835		10	2.53	7.4	4.965		10		4.55	4.55		10	1	4	2.5		10	1		1		10		0.56	0.56
11	4	2.78	3.39		11	3.33	8.57	5.95		11	4.12	3.36	3.74		11	2.14	2.87	2.505		11	2		2		11	1	3	2		11	0.55		0.55
12	2.03	0.63	1.33		12		4.28	4.28		12	0.87	4.27	2.57		12		4.37	4.37		12	3	2	2.5		12	0.81	0.65	0.73		12	0.81		0.81
13	2.18	1.2	1.69		13	5.2	6.5	5.85		13	4.61	7.41	6.01		13	2.49		2.49		13	1		1		13	2	1	1.5		13	0.33	0.45	0.39
14	1.77		1.77		14	5.03	1.56	3.295		14	9.77		9.77		14	5.52	1.65	3.585		14		3	3		14	0.67	0.35	0.51		14	1.81	0.52	1.165
15	3.36	0.72	2.04		15	1.82	2.45	2.135		15		9.7	9.7		15	1.68		1.68		15		5	5		15	1		1		15		1.14	1.14
16	0	1.78	0.89		16	3.06	7.18	5.12		16		0.92	0.92		16		4.72	4.72		16	5	1	3		16	0.45	0.86	0.655		16		0.23	0.23
17	1.24	1.5	1.37		17	2.23	2.25	2.24		17	7.01		7.01		17	2.21	5.69	3.95		17	7	6.3	6.65		17		1	1		17	0.31	1.04	0.68
18	4.15	1.25	2.7		18	5.11	1.55	3.33		18	0.91	0.93	0.92		18	1.61	2.02	1.815		18		0.8	0.8		18		0.72	0.72		18	1.2		1.2
19	3.2		3.2		19	3	4	3.5		19	6.69	2.17	4.43		19	9.9	3.77	6.835		19		2.3	2.3		19	1.48		1.48		19	4.08	6.12	5.1
20	3.42	2.79	3.105		20	7.9	3	5.45		20		2.35	2.35		20	2.44	5.87	4.155		20	6.12	1.09	3.605		20	0.72		0.72		20	0.64	2.07	1.36
21	2.35		2.35		21	9	5	7							21	9.82	5.36	7.59		21		1.07	1.07		21	1.02	0.9	0.96		21	0.38	0.42	0.4
22	1.14	4.61	2.875		22	5.08	2.07	3.575							22	8.45	3.84	6.145							22	0.42	0.43	0.425		22	0.29		0.29
					23		3	3							23	8.11	2.19	5.15							23	0.79	1.8	1.295		23	0.5	0.5	0.5
															24	2.25		2.25							24	0.38	0.81	0.595		24	1.03	0.5	0.765
															25	1.92	8.14	5.03							25		0.85	0.85		25	0.6	0.23	0.415
																														26	1.28		1.28
