# Supplementary material for: Glia-neuron coupling via a bipartite sialylation pathway promotes neural transmission and stress tolerance in Drosophila
Source: eLife. 2023 Mar 22;12:e78280. doi: 10.7554/eLife.78280 (PMC10110239; doi:10.7554/eLife.78280)
Supplement: Figure 3—source data 3. [file elife-78280-fig3-data3.xlsx]

## Sheet: Fig. 2C
Figure 3 C Source data
	EJP (mV)
Animal #	WT	Repo>_ CSAS21/21	_>CSAS CSAS21/21	Repo>CSAS CSAS21/21	C164>CSAS CSAS21/21
1	12.09	3.8117	5.18349	24.5298	0.740966
2	11.1578	8.56431	0.91387	4.08008	6.57795
3	12.6637	1.10133	10.0635	18.8182	4.61952
4	10.7464	2.99283	2.03846	10.1561	2.17158
5	7.50432	2.87832	4.34243	23.6785	9.06677
6	18.6297	1.09	1.06	9.24233	5.03981
7	15.8298	2.8167		13.4041
8		8.63194
9		3.0968
