# Supplementary material for: Glia-neuron coupling via a bipartite sialylation pathway promotes neural transmission and stress tolerance in Drosophila
Source: eLife. 2023 Mar 22;12:e78280. doi: 10.7554/eLife.78280 (PMC10110239; doi:10.7554/eLife.78280)
Supplement: Figure 3—source data 4. [file elife-78280-fig3-data4.xlsx]

## Sheet: CSAS-RNAi
Onset of paralysis at 38C, sec
Fly #	WT		^_>CSAS-RNAi		^C155>CSAS-RNAi		^Repo>_		^Repo>CSAS-RNAi		CSAS[21/21]
1	2327		2402		1658		1080		173		154
2	883		1387		2153		1475		129		292
3	1397		1387		2495		1528		327		117
4	2120		1926		1519		1563		261		362
5	1373		1431		1694		2063		128		68
6	2492		1883		2112		1834		182		54
7	2568		1623		1735		2448		130		113
8	2497		1268		1437		2155		167		68
9	2754		1520		1202		1138		290		142
10	1912		1786		1446		2318		132		378
11	2130		1367		1741		2600		352		169
12	842		1785		2064		2373		182		88
13	2892		1733		1417		2129		304		147
14	2452		1234		2197		1694		225		341
15	1701		1785		2174		2097		154		149
16	2997		1320		1614		2513		473		129
17	1858		1155		1608		1539		222		178
18	1527		1001		2091		2367		268		84
19	1515		1001		2134		1555		419		156
20	1762		1492		1613		1908		166		128
