# Supplementary material for: Glia-neuron coupling via a bipartite sialylation pathway promotes neural transmission and stress tolerance in Drosophila
Source: eLife. 2023 Mar 22;12:e78280. doi: 10.7554/eLife.78280 (PMC10110239; doi:10.7554/eLife.78280)
Supplement: Figure 4—source data 1. [file elife-78280-fig4-data1.xlsx]

## Sheet: DSiaT RNAi
Onset of TS paralysis, sec
Fly #	WT		_>DSiaT-RNAI		C155>_		Repo>_		Repo>DSiaT-RNAi		C155>DSiaT-RNAi		DSiaT[s23/s23]
1	1394		1833		1058		729		2400		275		278
2	1889		2090		1088		925		2400		555		321
3	1980		2276		2120		1060		2400		461		333
4	1244		1754		1005		1268		2400		474		356
5	1692		2008		1219		921		1938		550		588
6	2221		1763		897		990		2067		405		371
7	1800		1479		681		670		2388		418		389
8	1800		2154		887		1007		2400		499		476
9	1772		2211		923		1819		2267		419		414
10	2061		2182		2307		822		2403		506		323
11	1922		2410		989		1652		2247		266		395
12	2195		2466		932		820		1333		532		445
13	2074		2223		1588		1082		1446		661		515
14	575		2294		922		961		2178		281		745
15	1823		2251		968		1664		1882		490		920
16	1909		2353		1467		1511		1638		320		221
17	2066		2337		1415		1422		2502		526		266
18	2161		2406		869		1296		2515		500		285
19	1890		2254		950		949		2193		588		360
20	1122		2492		1075		1018		2390		458		385
21	2115		2570		1013		1422				779
22	1583		2514		1095		1038				378
23	1650		1698		1464		1499				602
24	1402		1534		1830		1643
25	1720				1962		1452
26	1440				1851
27	1611				1315
28					1702
