# Supplementary material for: Glia-neuron coupling via a bipartite sialylation pathway promotes neural transmission and stress tolerance in Drosophila
Source: eLife. 2023 Mar 22;12:e78280. doi: 10.7554/eLife.78280 (PMC10110239; doi:10.7554/eLife.78280)
Supplement: Figure 5—source data 1. [file elife-78280-fig5-data1.xlsx]

## Sheet: Fig. 5A
Peak area normalized on 13C-Neu5Ac
3 biological repeats, each including 2-3 technical repeats
WT	CSAS21/21	Repo>CSAS CSAS21/21
0.001746	8.55e-05	0.00035
0.001261	2.33e-05	0.000468
0.002415	5.95e-05	0.000404
	6.57e-05	0.000815
0.002238	5.57e-05	0.000643
0.00219	0.000108	0.000488
0.002255	6.16e-05	0.00066
	2.59e-05	0.00042
0.001959	6.3e-05	0.000545
