# Supplementary material for: Glia-neuron coupling via a bipartite sialylation pathway promotes neural transmission and stress tolerance in Drosophila
Source: eLife. 2023 Mar 22;12:e78280. doi: 10.7554/eLife.78280 (PMC10110239; doi:10.7554/eLife.78280)
Supplement: Figure 5—source data 2. [file elife-78280-fig5-data2.xlsx]

## Sheet: Fig. 5B
Ion [321.999451/321.999451] - 322.0000-
	abundance
Retention Time	WT	CSAS 21/21	Repo>CSAS CSAS 21/22			Retention Time	CMP-Sai Standard
16.0257	42.34	45.1789	42.5103			16.0256	42.1
16.0352	42.314	43.9171	42.597			16.0352	42.113
16.0448	42.3271	42.3543	42.4972			16.0448	42.1472
16.0544	42.2693	42.38	42.4906			16.0544	46.3813
16.0641	42.3577	42.4534	42.4906			16.064	43.7219
16.0737	42.339	42.3885	42.4495			16.0736	42.12
16.0833	42.4149	42.36	42.4084			16.0832	42.0725
16.0928	42.358	42.278	42.4164			16.0928	42.1256
16.1024	42.3739	42.26	42.5387			16.1024	42.0721
16.112	42.2923	42.3477	42.56			16.112	42.0951
16.1216	42.4791	42.5048	42.5419			16.1216	42.0639
16.1313	42.3132	42.3895	42.5027			16.1312	42.1532
16.1409	42.473	42.3031	42.5			16.1408	42.1792
16.1504	42.48	42.2802	42.5			16.1504	42.1009
16.16	42.4495	42.3207	42.4492			16.16	42.0797
16.1696	42.4191	42.3573	42.4			16.1696	42.0645
16.1792	42.3983	42.3083	42.3983			16.1792	42.155
16.1889	43.204	42.3976	42.38			16.1888	42.1024
16.1985	48.1198	42.3673	42.3895			16.1984	42.1168
16.208	42.404	42.2843	42.4321			16.208	42.1039
16.2176	42.4058	42.9938	42.3906			16.2176	43.8953
16.2272	42.3929	44.6293	42.3874			16.2272	47.5805
16.2368	42.4551	42.3075	42.4226			16.2368	42.12
16.2465	42.407	42.308	42.403			16.2464	42.0571
16.2561	42.3733	42.3289	42.4733			16.256	41.94
16.2656	42.2829	42.3227	42.4085			16.2656	41.9656
16.2752	42.26	42.3149	42.4293			16.2752	42.9578
16.2848	42.2801	42.2501	42.4501			16.2848	43.0243
16.2944	42.3325	42.2708	42.4383			16.2944	42.0433
16.3041	42.2914	42.2457	42.3857			16.304	42.08
16.3137	42.3376	42.2322	42.421			16.3136	42.0312
16.3232	42.3736	42.2795	42.4863			16.3232	42
16.3328	42.36	42.3565	42.4576			16.3328	42.0424
16.3424	42.3751	42.3649	42.4854			16.3424	42.0751
16.352	42.38	42.36	42.5321			16.352	46.5461
16.3617	42.363	42.3771	42.5059			16.3616	46.2762
16.3713	42.288	42.236	42.428			16.3712	42.4763
16.3808	42.4888	42.201	42.5149			16.3808	42.08
16.3904	42.3603	46.3444	42.5001			16.3904	42.0401
16.4	42.3391	44.2691	44.0995			16.4	42.1027
16.4096	42.3181	42.3562	45.2653			16.4096	42.5821
16.4193	43.3094	42.32	42.4343			16.4192	46.0234
16.4289	48.0667	42.3162	42.4458			16.4288	41.9476
16.4384	42.42	42.3	43.5612			16.4384	41.9848
16.448	42.4142	42.3057	45.3457			16.448	42
16.4576	42.3664	43.1374	42.4867			16.4576	42.0335
16.4672	42.3	43.8379	42.4462			16.4672	42.0847
16.4769	42.3606	42.3513	43.9094			16.4768	42.0773
16.4865	46.8549	42.3015	44.2279			16.4864	42.0712
16.496	46.7203	42.2283	42.4329			16.496	42.0506
16.5056	42.3716	42.1769	42.4569			16.5056	42.0716
16.5152	45.2244	42.2726	42.5026			16.5152	42.0925
16.5248	43.8719	42.3939	44.4267			16.5248	42.0191
16.5345	42.3711	42.3477	43.2428			16.5344	48.5484
16.5441	42.4063	48.3485	42.4246			16.544	44.1765
16.5536	42.4036	43.6154	42.338			16.5536	42.0708
16.5632	42.4173	42.3014	42.4241			16.5632	48.4271
16.5728	47.1842	42.265	42.5133			16.5728	42.62
16.5824	42.6782	42.1829	46.7791			16.5824	46.2012
16.5921	42.4493	42.2306	44.6612			16.592	44.2151
16.6017	42.4012	42.2751	42.4449			16.6016	42.1224
16.6112	42.4091	42.2087	42.5178			16.6112	42.8351
16.6208	42.3168	42.2863	42.4874			16.6208	48.5997
16.6304	42.3	42.3077	42.4323			16.6304	48.3653
16.64	42.3051	43.9344	42.5105			16.64	44.6512
16.6497	42.3018	46.8678	42.5758			16.6496	49.0182
16.6593	42.3022	42.327	42.5552			16.6592	42.154
16.6688	42.38	42.348	42.58			16.6688	43.8709
16.6784	42.371	42.3421	43.7117			16.6784	44.4748
16.688	42.3898	42.3101	43.8103			16.688	42.08
16.6976	42.3982	44.5869	42.5071			16.6976	44.5094
16.7073	42.4038	44.0102	42.4852			16.7072	43.8724
16.7169	42.3815	42.3257	42.4457			16.7168	42.0785
16.7264	42.291	42.2434	42.46			16.7264	45.2277
16.736	45.8328	42.3034	42.5043			16.736	44.1464
16.7456	43.2762	47.6901	42.4571			16.7456	42.4416
16.7552	42.2066	43.3995	42.4567			16.7552	42.1532
16.7649	44.8857	42.2953	42.4247			16.7648	49.0664
16.7745	45.7436	42.2814	42.4945			16.7744	42.6444
16.784	42.3891	42.2996	42.5			16.784	42.1784
16.7936	42.3714	42.3	42.4794			16.7936	42.4165
16.8032	42.4154	42.3092	42.4631			16.8032	42.6017
16.8128	42.365	42.41	42.495			16.8128	42.6946
16.8225	42.4	42.34	42.4565			16.8224	103.312
16.8321	42.4178	42.3533	42.4533			16.832	1149.74
16.8417	43.4119	43.5429	42.4892			16.8416	11036.9
16.8512	62.4563	45.2885	50.1353			16.8512	53687.7
16.8608	108.391	42.3853	63.58			16.8608	136994
16.8704	155.957	42.3517	73.9526			16.8704	194738
16.8801	183.966	42.3586	117.538			16.88	209298
16.8897	156.796	42.3595	106.581			16.8896	187953
16.8993	107.352	42.3952	70.8748			16.8992	113264
16.9088	77.6902	45.2083	69.5564			16.9088	57403.1
16.9184	55.0378	43.8754	57.6676			16.9184	27487.1
16.928	49.7531	44.9869	46.2526			16.928	17540.5
16.9377	48.2333	43.1476	49.648			16.9376	14788.4
16.9473	43.7729	42.3	47.829			16.9472	14025.1
16.9569	50.5346	42.4253	42.9704			16.9568	13513.4
16.9664	51.0566	42.3255	45.628			16.9664	10900.4
16.976	48.7917	42.32	46.1142			16.976	9549.27
16.9856	46.4509	42.3214	46.3313			16.9856	8252.42
16.9952	44.2342	42.3452	44.6038			16.9952	6779.94
17.0049	42.3524	42.38	42.5038			17.0048	5389.6
17.0145	42.335	42.37	42.505			17.0144	4089.39
17.024	42.3182	42.3462	42.4785			17.024	2681.93
17.0336	44.7431	42.3527	42.5347			17.0336	1843.24
17.0432	46.2535	42.3571	42.5515			17.0432	1418.71
17.0528	42.4195	42.3897	42.5205			17.0528	1161.81
17.0625	42.4182	42.3672	42.4672			17.0624	1050.77
17.0721	42.3879	42.3279	42.5005			17.072	972.694
17.0816	42.3933	42.3598	42.6064			17.0816	833.123
17.0912	46.8436	42.3511	42.5533			17.0912	748.157
17.1008	47.5848	45.157	42.4418			17.1008	640.182
17.1104	43.1784	42.8422	42.4873			17.1104	454.664
17.1201	42.3279	42.296	42.536			17.12	370.813
