# Supplementary material for: Glia-neuron coupling via a bipartite sialylation pathway promotes neural transmission and stress tolerance in Drosophila
Source: eLife. 2023 Mar 22;12:e78280. doi: 10.7554/eLife.78280 (PMC10110239; doi:10.7554/eLife.78280)
Supplement: Figure 6—source data 1. [file elife-78280-fig6-data1.xlsx]

## Sheet: Sheet1
Figure 6. Source data
Onset of TS paralysis, sec
Animal #	CSASMi/21	C155>CSAS CSASMi/21	C155>NANS CSASMi/21	_>CSAS+NANS CSASMi/21	C155>CSAS+NANS CSASMi/21	WT
1	138	381	51	57	792	900
2	178	234	90	95	906	1325
3	355	288	136	83	486	984
4	185	432	169	52	638	1110
5	469	238	64	79	520	1264
6	69	250	78	57	1279	1269
7	600	280	78	434	1401	1200
8	71	165	42	324	958	961
9	518	410	66	364	986	1371
10	488	387	78	301	842	1620
11	403	414	66	274	965	1687
12	645	302	390	559	946	1815
13	304	229	119	381	1125	1348
14	328	415	86	212	521	1658
15	589	436	53	295	677	1766
16	528	245	270	391	860	1858
17	82	202	270	210	880	1865
18	302	194	198	236	583	1397
19	156	111	322	138	600	1783
20	84	284	204	153	1344	1540
21	591	259	190	183	642	1863
22	207	262	168		676	1552
23		266	137		873
24		271			955
25		369			720
26		328			986
27		266			745
28		391
29		362
30		348
31		245
32		271
33		200
34		155
35		212
36		163
37		234
