# Supplementary material for: Glia-neuron coupling via a bipartite sialylation pathway promotes neural transmission and stress tolerance in Drosophila
Source: eLife. 2023 Mar 22;12:e78280. doi: 10.7554/eLife.78280 (PMC10110239; doi:10.7554/eLife.78280)
Supplement: Figure 7—source data 1. [file elife-78280-fig7-data1.xlsx]

## Sheet: Fig. 6A
	Onset of paralysis, sec
Fly #	CSAS21/21	CSAS21/+	WT
1	216	897	1477
2	672	1136	1440
3	315	1189	1274
4	306	1082	1480
5	297	978	1440
6	340	867	1285
7	327	1220	1560
8	252	900	1830
9	640	890	1050
10	407	938	2210
11	343	1308	1143
12	146	1043	1030
13	218	1125	1030
14	316	1062	1220
15	298	930	2040
16	297	1037	1740
17	150	1050	1100
18	287	930	2174
19	316	802	1420
20	362	863	1460
21		917	1025
22		1015	1695
23		1212	1773
24		955	1114
25		1125	1847
26		1110	2230
27		1259	1440
28		980	1380
29		1097	1620
30		960	1680
31		925	1464
32		1135	1660
33		1018	1700
34		850	1411
35		1012	1430
36		1069	1320
37		957	1660
38		1126	1662
39		1135	1182
40		1048	1020
41			1142
42			1070
43			1150
44			1455
45			1530
46			1077
47			1390
