# Supplementary material for: Glia-neuron coupling via a bipartite sialylation pathway promotes neural transmission and stress tolerance in Drosophila
Source: eLife. 2023 Mar 22;12:e78280. doi: 10.7554/eLife.78280 (PMC10110239; doi:10.7554/eLife.78280)
Supplement: Figure 7—source data 2. [file elife-78280-fig7-data2.xlsx]

## Sheet: Fig. 6B
	Onset of paralysis, sec
Fly #	Act >_	Act > CSAS[15]	Act > CSAS[5]	_> CSAS[15]
1	486	523	531	450
2	450	777	648	375
3	550	554	634	410
4	568	746	731	480
5	538	750	686	440
6	570	871	708	498
7	451	836	627	463
8	568	578	758	500
9	571	717	779	520
10	627	680	701	552
11	633	696	544	490
12	530	681	819	508
13	535	688	781	460
14	696	611	563	380
15	590	757	697	406
16	522	770	552	520
17	559	410	743	540
18	520	644	697	515
19	530	685	552	530
20	523	744	743	570
21	498	450	530	410
22		639	721	380
23		690	563	540
24			669	540
25			603	490
26			538	495
27			578	465
28			747	447
29			762	470
30			567	499
31			715	448
32			859	575
33			615	390
34			750	455
35			810	317
36			720	427
37			790	378
38			683	510
39			732	380
40			720	497
41			740	460
42			750	420
43			740	477
44			716	640
				488
				445
				413
				565
				535
				570
				551
				370
				495
				528
				406
				465
				395
				560
				450
