# Supplementary material for: Glia-neuron coupling via a bipartite sialylation pathway promotes neural transmission and stress tolerance in Drosophila
Source: eLife. 2023 Mar 22;12:e78280. doi: 10.7554/eLife.78280 (PMC10110239; doi:10.7554/eLife.78280)
Supplement: Figure 8—figure supplement 1—source data 1. [file elife-78280-fig8-figsupp1-data1.xlsx]

## Sheet: Sheet1
Figure 8 - figure supplement 1. Source data
Death events
time, h	&WT	&CSAS21/21	Repo>CSAS CSAS21/21	Repo>CSAS
16	1	1
16		1
16		1
16		1
16		1
16		1
16		1
16		1
16		1
18		1	1
18		1
20	1	1	1
20		1	1
20		1	1
20		1
20		1
20		1
20		1
20		1
20		1
20		1
20		1
20		1
20		1
24	1	1	1	1
24	1	1	1	1
24	1	1	1	1
24	1	1	1
24	1	1
24		1
24		1
24		1
24		1
24		1
24		1
24		1
24		1
24		1
24		1
28	1	1	1	1
28	1	1	1	1
28	1	1	1
28	1	1	1
28	1	1	1
28	1	1	1
28	1	1	1
28		1	1
28		1	1
28		1	1
28		1	1
28		1
28		1
28		1
28		1
28		1
28		1
28		1
28		1
28		1
28		1
28		1
28		1
28		1
28		1
28		1
28		1
28		1
28		1
28		1
28		1
28		1
28		1
28		1
40	1	1	1	1
40	1	1	1	1
40	1	1	1	1
40	1	1	1	1
40	1	1	1	1
40	1	1	1	1
40	1	1	1	1
40	1	1	1	1
40	1	1	1	1
40	1	1	1	1
40	1	1	1
40	1	1	1
40	1	1	1
40	1	1	1
40	1	1	1
40	1	1	1
40		1	1
40		1	1
40		1	1
40		1	1
40		1	1
40		1	1
40		1	1
40		1	1
40		1	1
40		1	1
40		1	1
40		1	1
40		1	1
40		1	1
40		1	1
40		1	1
40		1	1
40		1	1
40		1	1
40		1	1
40		1	1
40		1	1
40		1	1
40		1
40		1
40		1
40		1
40		1
40		1
40		1
40		1
40		1
40		1
40		1
40		1
40		1
40		1
40		1
40		1
40		1
40		1
40		1
40		1
40		1
40		1
40		1
40		1
40		1
40		1
40		1
40		1
40		1
40		1
40		1
40		1
40		1
40		1
40		1
40		1
40		1
40		1
40		1
40		1
40		1
40		1
40		1
40		1
40		1
40		1
40		1
40		1
40		1
40		1
40		1
40		1
40		1
40		1
40		1
40		1
40		1
40		1
40		1
40		1
40		1
40		1
40		1
40		1
40		1
40		1
40		1
40		1
40		1
40		1
40		1
40		1
40		1
44	1	1	1	1
44	1	1	1	1
44	1	1	1	1
44	1	1	1	1
44		1
44		1
44		1
44		1
44		1
44		1
44		1
44		1
44		1
44		1
44	1		1
44	1		1
44	1		1
44			1
48	1	1	1	1
48	1	1	1	1
48	1	1	1	1
48		1
48		1
48		1
48		1
48	1		1	1
48	1		1	1
48	1		1	1
48	1		1	1
48	1			1
52		1
52		1
52		1
52	1	1	1	1
52	1	1	1	1
52	1		1	1
52	1		1	1
52	1		1	1
52	1		1	1
52	1			1
52	1			1
52				1
52				1
52				1
64		1
64	1	1	1	1
64	1		1	1
64	1		1	1
64	1		1	1
64	1		1	1
64	1		1	1
64	1		1	1
64	1		1	1
64	1		1	1
64	1		1	1
64	1		1	1
64	1		1	1
64	1		1	1
64	1		1	1
64	1		1	1
64	1		1	1
64	1		1	1
64	1		1	1
64	1		1	1
64	1		1	1
64	1		1	1
64	1			1
64	1			1
64	1			1
64	1			1
64	1			1
64	1			1
68	1		1	1
68	1		1	1
68	1		1	1
68	1		1	1
68	1		1	1
68	1		1	1
68	1		1	1
68	1			1
68				1
68				1
68				1
68				1
68				1
68				1
68				1
68				1
68				1
68				1
68				1
68				1
68				1
68				1
72	1		1	1
72	1		1	1
72	1		1	1
72	1		1	1
72	1		1	1
72			1	1
72				1
72				1
72				1
72				1
72				1
72				1
72				1
72				1
72				1
72				1
76	1		1	1
76	1		1	1
76	1		1	1
76	1			1
76	1			1
76	1			1
76				1
76				1
76				1
76				1
76				1
88	1		1	1
88	1		1	1
88	1		1	1
88	1		1	1
88	1		1	1
88	1		1	1
88	1		1	1
88	1		1	1
88			1	1
88				1
88				1
88				1
88				1
92	1		1	1
92	1			1
96	1			1
96	1			1
96				1
100	1		1	1
100	1			1
100	1			1
104			1	1
104				1
104				1
112			1	1
112				1
112				1
112				1
