# Supplementary material for: Glia-neuron coupling via a bipartite sialylation pathway promotes neural transmission and stress tolerance in Drosophila
Source: eLife. 2023 Mar 22;12:e78280. doi: 10.7554/eLife.78280 (PMC10110239; doi:10.7554/eLife.78280)
Supplement: Figure 8—source data 1. [file elife-78280-fig8-data1.xlsx]

## Sheet: Fig 8A
Figure 8A . Source data
Survival, %
N	time, h	0	3	16	24	28	40	48	52	64	68	72	76	88	92	96	100	104	112
11	WT	100	100	100	90.9091	90.9091	72.7273	45.4545	45.4545	18.1818	9.09091	9.09091	9.09091	9.09091	0	0	0
10	WT	100	100	90	90	80	40	20	20	20	20	20	0	0	0	0	0
11	WT	100	100	100	100	90.9091	81.8182	72.7273	72.7273	45.4545	36.3636	27.2727	27.2727	18.1818	18.1818	9.09091	0
11	WT	100	100	100	100	100	81.8182	72.7273	72.7273	36.3636	36.3636	27.2727	27.2727	18.1818	9.09091	9.09091	0
11	WT	100	100	100	100	100	100	81.8182	63.6364	27.2727	18.1818	18.1818	18.1818	0	0	0	0
8	WT	100	100	100	100	75	50	37.5	25	12.5	0	0	0	0	0	0	0
10	WT	100	100	100	70	50	50	40	20	0	0	0	0	0	0	0	0
10	WT	100	100	100	100	100	90	80	80	80	50	40		0	0	0	0
10	WT	100	100	100	90	90	70	70	70	70	60	40		20		10	0
11	WT	100	100	100	100	100	90.9091	81.8182	54.5455	9.09091	9.09091	9.09091	0	0	0	0	0
11	WT	100	100	100	90.9091	81.8182	72.7273	54.5455	54.5455	9.09091	9.09091	9.09091	9.09091	0	0	0	0
10	CSAS21/21	100	100	100	100	70	0	0	0	0
9	CSAS21/21	100	100	88.8889	77.7778	77.7778	33.3333	22.2222	11.1111	0
11	CSAS21/21	100	100	90.9091	54.5455	27.2727	9.09091	9.09091	0	0
11	CSAS21/21	100	100	63.6364	36.3636	18.1818	0	0	0	0
10	CSAS21/21	100	100	100	90	80	10	0	0	0
10	CSAS21/21	100	100	100	90	60	20	0	0	0
10	CSAS21/21	100	100	100	70	50	0	0	0	0
10	CSAS21/21	100	100	100	100	90	20	0	0	0
10	CSAS21/21	100	100	100	100	60	10	0	0	0
10	CSAS21/21	100	100	100	100	90	0	0	0	0
10	CSAS21/21	100	100	90	70	70	0	0	0	0
10	CSAS21/21	100	100	100	90	90	50	0	0	0
10	CSAS21/21	100	100	100	90	80	10	0	0	0
10	CSAS21/21	100	100	100	90	70	10	0	0	0
10	CSAS21/21	100	100	100	90	90	20	10	10	0
10	CSAS21/21	100	100	100	80	30	0	0	0	0
10	CSAS21/21	100	100	100	100	80	20	0	0	0
10	CSAS21/21	100	100	90	60	40	10	10	0	0
10	CSAS21/21	100	100	100	70	60	10	10	0	0
10	CSAS21/21	100	100	100	90	80	0	0	0	0
10	CSAS21/21	100	100	100	90	90	50	10	0	0
12	Repo>CSAS CSAS21/21	100	100	100	100	100	66.6667	41.6667	41.6667	25	25	16.6667	16.6667	0	0	0	0	0
10	Repo>CSAS CSAS21/21	100	100	100	100	100	60	40	40	20	20	20	20	0	0	0	0	0
10	Repo>CSAS CSAS21/21	100	100	100	100	90	50	40	30	30	30	30	10	10	0	0	0	0
12	Repo>CSAS CSAS21/21	100	100	100	100	91.6667	41.6667	41.6667	25	8.33333	8.33333	8.33333	0	0	0	0	0	0
11	Repo>CSAS CSAS21/21	100	100	100	81.8182	81.8182	54.5455	36.3636	36.3636	27.2727	9.09091	9.09091	9.09091	0	0	0	0	0
11	Repo>CSAS CSAS21/21	100	100	100	90.9091	63.6364	54.5455	36.3636	27.2727	18.1818	9.09091	0	0	0	0	0	0	0
11	Repo>CSAS CSAS21/21	100	100	100	90.9091	81.8182	72.7273	63.6364	45.4545	36.3636	9.09091	9.09091	9.09091	9.09091	9.09091	9.09091	9.09091	0
10	Repo>CSAS CSAS21/21	100	100	100	100	70	40	30	30	20	20	10	10	10	10	10	0	0
10	Repo>CSAS CSAS21/21	100	100	100	60	50	30	30	30	20	20	20	20	0	0	0	0	0
10	Repo>CSAS CSAS21/21	100	100	100	100	90	60	50	50	20	10	10	10	0	0	0	0	0
11	Repo>CSAS CSAS21/21	100	100	100	100	100	72.7273	63.6364	63.6364	36.3636	36.3636	9.09091	9.09091	9.09091	0	0	0	0
11	Repo>CSAS CSAS21/21	100	100	100	100	100	54.5455	45.4545	45.4545	9.09091	9.09091	9.09091	9.09091	0	0	0	0	0
10	Repo>CSAS	100	100	100	90	90	80	60	30	20	0	0	0	0	0	0	0	0	0
11	Repo>CSAS	100	100	100	100	100	72.7273	45.4545	45.4545	27.2727	9.09091	9.09091	9.09091	9.09091	9.09091	9.09091	0	0	0
10	Repo>CSAS	100	100	100	100	90	90	90	90	80	60	50	20	10	0	0	0	0	0
11	Repo>CSAS	100	100	100	100	100	100	100	81.8182	63.6364	54.5455	27.2727	27.2727	18.1818	10	10	0	0	0
9	Repo>CSAS	100	100	100	100	100	88.8889	55.5556	55.5556	44.4444	33.3333	22.2222	22.2222	0	0	0	0	0	0
8	Repo>CSAS	100	100	100	87.5	87.5	75	75	75	75	25	12.5	12.5	0	0	0	0	0	0
11	Repo>CSAS	100	100	100	100	100	100	100	90.9091	63.6364	45.4545	27.2727	27.2727	18.1818	18.1818	18.1818	18.1818	18.1818	0
11	Repo>CSAS	100	100	100	100	100	90.9091	90.9091	81.8182	36.3636	36.3636	27.2727	18.1818	0	0	0	0	0	0
11	Repo>CSAS	100	100	100	100	100	100	100	90.9091	63.6364	63.6364	36.3636	36.3636	36.3636	36.3636	27.2727	18.1818	0	0
11	Repo>CSAS	100	100	100	100	100	100	90.9091	81.8182	54.5455	36.3636	36.3636	27.2727	18.1818	18.1818	18.1818	9.09091	9.09091	0
9	Repo>CSAS	100	100	100	100	100	100	88.8889	88.8889	88.8889	66.6667	66.6667	55.5556	33.3333	33.3333	11.1111	11.1111	11.1111	0
10	Repo>CSAS	100	100	100	90	90	90	90	70	30	10	10	0	0	0	0	0	0	0
10	Repo>CSAS	100	100	100	100	100	100	90	90	80	60	50	20	10	0	0	0	0	0
11	Repo>CSAS	100	100	100	100	90.9091	63.6364	54.5455	54.5455	45.4545	45.4545	18.1818	9.09091	0	0	0	0	0	0
