# Supplementary material for: Glia-neuron coupling via a bipartite sialylation pathway promotes neural transmission and stress tolerance in Drosophila
Source: eLife. 2023 Mar 22;12:e78280. doi: 10.7554/eLife.78280 (PMC10110239; doi:10.7554/eLife.78280)
Supplement: Figure 8—source data 2. [file elife-78280-fig8-data2.xlsx]

## Sheet: Fig 8B
	Figure 8B. Source data
	50% survival, h
	WT	CSAS21/21	Repo>CSAS CSAS21/21	Repo>CSAS
	46.5	31.5	45.3	49.3
	37	35.4	44	46.6
	62	24.7	40	72
	59.5	20	38	68.6
	56.5	33	42	58
	40	31	42	66
	28	28	51	67
	68	35	36	60.5
	70	30.5	28	70
	53.2	33	48	65
	53.2	31.5	58	79
		40	44	58
		31.2		72
		32		58
		35
		26.4
		34
		26
		30.5
		32.5
		40
