# Supplementary material for: Glia-neuron coupling via a bipartite sialylation pathway promotes neural transmission and stress tolerance in Drosophila
Source: eLife. 2023 Mar 22;12:e78280. doi: 10.7554/eLife.78280 (PMC10110239; doi:10.7554/eLife.78280)
Supplement: Figure 9—figure supplement 1—source data 1. [file elife-78280-fig9-figsupp1-data1.xlsx]

## Sheet: Fig 9 - fig suppl. 1A
Figure 9 - figure supplement 1A Source Data
para qRT-PCR analyses
Fold change calculated using the 2^(-Delta Delta Ct) method
			Cq		average Cq WT		fold change
			para	tubulin	para	tub	para
	exp1	WT	28.0364	20.409	28.0114	20.2844	1.07145
		WT	28.1416	20.1625			0.839659
		WT	27.8561	20.2816			1.11154
	exp2	WT	28.1419	19.8836	27.8704	19.623	0.992514
		WT	27.6958	19.523			1.05313
		WT	27.7735	19.4623			0.956715
	exp3	WT	28.516	20.5824	28.3379	20.4968	0.937898
		WT	28.2022	20.2973			0.956749
		WT	28.2955	20.6107			1.11441
	exp1	DSiaTL22/L22	27.6523	19.9709			1.03212
		DSiaTL22/L22	27.7438	20.1284			1.08038
		DSiaTL22/L22	27.8592	20.335			1.1509
	exp2	DSiaTL22/L22	27.7348	19.9045			1.33522
		DSiaTL22/L22	27.8063	19.5893			1.02132
		DSiaTL22/L22	27.9089	19.7244			1.04459
	exp3	DSiaTL22/L22	28.1553	20.1978			0.922482
		DSiaTL22/L22	28.0998	20.2978			1.02742
		DSiaTL22/L22	28.0929	20.3472			1.06833
