# Supplementary material for: Glia-neuron coupling via a bipartite sialylation pathway promotes neural transmission and stress tolerance in Drosophila
Source: eLife. 2023 Mar 22;12:e78280. doi: 10.7554/eLife.78280 (PMC10110239; doi:10.7554/eLife.78280)
Supplement: Figure 9—figure supplement 1—source data 2. [file elife-78280-fig9-figsupp1-data2.xlsx]

## Sheet: Data
Fig 9 – figure supplement 1B source data
Ponceau S and anti-GFP western blot quantification: Signal intensity integrated over area by ImageJ
	GFP/Ponceau S, normalized
	Experiment #	$WT	$DSiaTL22/L22	$DSiaTL22/+
	1	0.718132	1.22154	1.06032
	2	1.10657	1.04224	0.851194
	3	1.06341	1.00521	0.931382
	4	0.988964	0.860523	1.15051
