# Supplementary material for: Glia-neuron coupling via a bipartite sialylation pathway promotes neural transmission and stress tolerance in Drosophila
Source: eLife. 2023 Mar 22;12:e78280. doi: 10.7554/eLife.78280 (PMC10110239; doi:10.7554/eLife.78280)
Supplement: Figure 9—source data 1. [file elife-78280-fig9-data1.xlsx]

## Sheet: Data
Figure 9A.
Source data
Ponceau S and anti-GFP western blot quantification: signal intensity integrated over area by ImageJ
		GFP/Ponceau S, normalized
	Experiment # (including technical repeats)	C155>_	C155>_ DSiaTL22/L22	C155>_ DSiaTL22/L22
	1	1.14596	0.739764	1.11428
		1.24581	0.747746	1.00645
	2	1.43688	0.357744	1.20537
		1.2228	0.820543	0.956661
	3	1.27424	0.648007	1.07776
		1.31905	0.487481	1.19347
		1.27246	0.870883	0.856654
	4	1.05341	0.750843	1.19574
	5	0.948438	0.77561	1.27595
		1.04124	0.750116	1.20864
		0.961278	0.753381	1.28534
