# Supplementary material for: Glia-neuron coupling via a bipartite sialylation pathway promotes neural transmission and stress tolerance in Drosophila
Source: eLife. 2023 Mar 22;12:e78280. doi: 10.7554/eLife.78280 (PMC10110239; doi:10.7554/eLife.78280)
Supplement: Supplementary file 1. [file elife-78280-supp1.docx]

Supplementary table of genetic strains and transgenic constructs used in the study. Genetic strains created in this study are available per request

| **Genotype/ allele abbreviation** | **Genotype details** | **Source / Reference** |
| --- | --- | --- |
| *WT*  *C155-Gal4*  *repo-Gal4*  *1407-Gal4*  *Act-Gal4*  *C164-Gal4*  *AyGal4*  *UAS-DSiaT-RNAi*  *LexAop2-mCD8-GFP*  *LexAop-GFP.nls*  *LexAop-FLP*  *C155>CD8-GFP*  *R85G01-Gal4*  *R56F03-Gal4*  *UAS-CSAS-RNAi*  *dEAAT1-Gal4*  *Gli-Gal4*  *MZ709-Gal4*  *Mj85b-Gal4*  *UAS-CSAS*  *UAS-CSAS-FLAG*  *UAS-DSiaT*  *para-GFP*  *CSAS21*  *CSASMi*  *DSiaTL22*  *DSiaTS23*  *BAC-CSAS*  *CSAS-LexA*  *DSiaT-HA*  *UAS-NANS*  *_ _*    *Genotypes generated in crosses*  *CSAS> mCD8-GFP*  *CSAS> GFPnls*  *BAC-CSAS CSAS21/21*  *CSAS>FLP _>CSAS CSASMi/Mi*  *CSAS>_ AyGal4>CSAS*  *CSASMi/Mi*  *CSAS>FLP AyGal4>CSAS*  *CSASMi/Mi*  *CSASMi/21*  *CSAS21/21*  *Repo>CSAS CSAS21/21*  *Gli>CSAS CSAS21/21*  *Mz709>CSAS CSASMi/21*  *R85G01>CSAS CSASMi/21*  *R56F03>CSAS CSASMi/21*  *dEAAT1>CSAS CSASMi/21*  *C155>CSAS CSAS21/21*  *Mj85b>CSAS CSAS21/21*  *1407>CSAS CSAS21/21*  *_>CSAS CSASMi/21*  *C155>_ CSASMi/21*  *Repo>_ CSAS21/21*  *C155>CSAS CSASMi/21*  *Repo>CSAS CSASMi/21*  *Repo>_ CSAS21/21*  *Gli>_ CSAS21/21*  *Mz709>_ CSAS21/21*  *C155>_ CSAS21/21*  *Mj85b>_ CSAS21/21*  *1407>_ CSAS21/21*  *_>CSAS CSAS21/21*  *R85G01>_ CSAS21/21*  *R56F03>_ CSAS21/21*  *dEAAT1>_ CSAS21/21*  *C164>CSAS CSAS21/21*  *^_>CSAS-RNAi*  *^C155>CSAS-RNAi*  *^Repo>_*  *^Repo>CSAS-RNAi*  *C155>CSAS-FLAG*  *C155>_*  *_>CSAS-FLAG*  *#_>DSiaT-RNAi*  *#C155>_*  *#Repo>_*  *#Repo>DSiaT-RNAi*  *#C155>DSiaT-RNAi*  *DSiaTS23/S23*  *C155>NANS CSASMi/21*  *_>CSAS+NANS CSASMi/21*  *C155>CSAS+NANS CSASMi/21*  *CSAS21/+*  *Act>_*  *Act> CSAS[5]*  *Act> CSAS[15]*  *_> CSAS[15*  *&WT*  *&CSAS21/21*  *Repo>CSAS*  *§C155>_*  *§C155>_ DSiaTL22/L22*  *§C155>DSiaT DSiaTL22/L22*  *DSiaTL22/L22*  *$WT*  *$DSiaTL22/L22*  *$DSiaTL22/+* | *w1118 Canton S*  *w1118 P{GawB}elavC155*  *w1118; P{w[+m*]=GAL4}repo/TM3, Sb1*  *w1118; P{w[+mW.hs]=GawB}insc[Mz1407]*  *w1118; P{w[+mC]=Act5CGAL4}17bFO1/TM6B,Tb1*  *w1118; P{w[+mW.hs]=GawB}C164*  *w1118; P{w[+mC]=AyGAL4}25/CyO*  *w1118; P{y[+t7.7] v[+t1.8]=TRiP.HMC02922}attP40*  *w1118; P{y[+t7.7] w[+mC]=13XLexAop2-mCD8::GFP}attP2*  *w1118; P{w[+mC]=lexAop-2xhrGFP.nls}2a*  *w1118; P{y[+t7.7] w[+mC]=8XLexAop2-FLPL}attP40*  *w*; P{w[+mW.hs]=GawB}elav[C155], P{w[+mC]=UAS-mCD8::GFP.L}*  *w1118; P{y[+t7.7] w[+mC]=GMR85G01-GAL4}attP2*  *w1118; P{y[+t7.7] w[+mC]=GMR56F03-GAL4}attP2*  *w1118; P{attP,y+,w3'}VIE-260B*  *w*; P{w[+mC]=Eaat1-GAL4.R}2*  *w1118; Gli-Gal4/ CyO*  *w1118; MZ709-Gal4*  *w1118 Mj85b-Gal4*  *w1118;UAS-CSAS*  *w1118;UAS-CSAS-FLAG*  *w1118;UAS-DSiaT*  *y1 w* Mi{PT-GFSTF.0}paraMI08578-GFSTF.0*  *w1118;CSAS21*  *w1118;CSASMi*  *w1118;DSiaTL22*  *w1118;DSiaTS23*  *w1118; PBac{CH322-158A02}VK00027*  *w1118; PBac{BAC-CSAS-LexA}VK00027*  *w1118; BAC-DSiaT-HA*  *w1118;UAS-NANS*  *_ _*  *w1118; BAC-CSAS-LexA/+; P{y[+t7.7] w[+mC]=13XLexAop2-mCD8::GFP}attP2/+*  *w1118; BAC-CSAS-LexA P{w[+mC]=lexAop-2xhrGFP.nls}2a /+*  *w1118;CSAS21/ CSAS21 PBac{CH322-158A02}VK00027*  *w1118; + /P{y[+t7.7] w[+mC]=8XLexAop2-FLPL}attP40 ; CSASMi PBac{BAC-CSAS-LexA}VK00027 / UAS-CSAS CSASMi*  *w1118; P{w[+mC]=AyGAL4}25 / + ; CSASMi PBac{BAC-CSAS-LexA}VK00027 / UAS-CSAS CSASMi*  *w1118; P{w[+mC]=AyGAL4}25 / P{y[+t7.7] w[+mC]=8XLexAop2-FLPL}attP40; CSASMi PBac{BAC-CSAS-LexA}VK00027 / UAS-CSAS CSASMi*  *w1118;CSASMi/ CSAS21*  *w1118;CSAS21/ CSAS21*  *w1118; P{w[+m*]=GAL4}repo CSAS21/ UAS-CSAS CSAS21*  *w1118; Gli-Gal4/+; CSAS21/ UAS-CSAS CSAS21*  *w1118; Mz709-Gal4 CSASMi/ UAS-CSAS CSAS21*  *w1118; P{y[+t7.7] w[+mC]=GMR85G01-GAL4}attP2 CSASMi/ UAS-CSAS CSAS21*  *w1118; P{y[+t7.7] w[+mC]=GMR56R03-GAL4}attP2 CSASMi/ UAS-CSAS CSAS21*  *w1118; P{w[+mC]=Eaat1-GAL4.R}2/+; CSASMi/ UAS-CSAS CSAS21*  *w1118 P{GawB}elavC155/ w1118 ; CSAS21/ UAS-CSAS CSAS21*  *w1118 Mj85b/ w1118 ; CSAS21/ UAS-CSAS CSAS21w1118; P{w[+mW.hs]=GawB}insc[Mz1407]/+; CSAS21/ UAS-CSAS CSAS21*  *w1118; UAS-CSAS CSAS21/ CSASMi*  *w1118 P{GawB}elavC155/ w1118 ; CSASMi/ CSAS21*  *w1118; P{w[+m*]=GAL4}repo CSASMi/ CSAS21*  *w1118 P{GawB}elavC155/ w1118 ; CSASMi/ UAS-CSAS CSAS21*  *w1118; P{w[+m*]=GAL4}repo CSASMi/ UAS-CSAS CSAS21*  *w1118; P{w[+m*]=GAL4}repo CSAS21/ CSAS21*  *w1118; Gli-Gal4/+; CSAS21/ CSAS21*  *w1118; Mz709-Gal4 CSAS21/ CSAS21*  *w1118 P{GawB}elavC155/ w1118 ; CSAS21/ CSAS21*  *w1118 Mj85b/ w1118 ; CSAS21/ CSAS21*  *w1118; P{w[+mW.hs]=GawB}insc[Mz1407]/+; CSAS21/ CSAS21*  *w1118; UAS-CSAS CSAS21/ CSAS21*  *w1118; P{y[+t7.7] w[+mC]=GMR85G01-GAL4}attP2 CSASMi/ CSAS21*  *w1118; P{y[+t7.7] w[+mC]=GMR56F03-GAL4}attP2 CSASMi/ CSAS21*  *w1118; P{w[+mC]=Eaat1-GAL4.R}2/+; CSASMi/ CSAS21*  *w1118; P{w[+mW.hs]=GawB}C164/+; CSAS21/ UAS-CSAS CSAS21*  *w1118 UAS-dcr2/+; P{attP,y+,w3'}VIE-260B / +; CSAS21/ +*  *w1118 P{GawB}elavC155/ w1118 UAS-dcr2; P{attP,y+,w3'}VIE-260B /+; CSAS21/+*  *w1118 UAS-dcr2 / w1118; P{w[+m*]=GAL4}repo CSAS21/ +*  *w1118 UAS-dcr2 / w1118; P{attP,y+,w3'}VIE-260B / + ;*  *P{w[+m*]=GAL4}repo CSAS21/ +*  *w1118 P{GawB}elavC155/ w1118 ; UAS-CSAS-FLAG/ +*  *w1118 P{GawB}elavC155/ w1118*  *w1118; UAS-CSAS-FLAG/ +*  *w1118; P{y[+t7.7] v[+t1.8]=TRiP.HMC02922}attP40 / +; DSiaTS23/ +*  *w1118 P{GawB}elavC155/ w1118 ; DSiaTS23/ +*  *w1118 ; DSiaTS23/+; P{w[+m*]=GAL4}repo / +*  *w1118; P{y[+t7.7] v[+t1.8]=TRiP.HMC02922}attP40 / DSiaTS23; P{w[+m*]=GAL4}repo / +*  *w1118 P{GawB}elavC155 / w1118;*  *P{y[+t7.7] v[+t1.8]=TRiP.HMC02922}attP40 / DSiaTS23*  *w1118; DSiaTS23/ DSiaTS23*  *w1118 P{GawB}elavC155/ w1118 ; CSASMi/ UAS-NANS CSAS21*  *w1118; UAS-CSAS CSASMi/ UAS-NANS CSAS21*  *w1118 P{GawB}elavC155/ w1118 ; UAS-CSAS CSASMi/ UAS-NANS CSAS21*  *w1118;CSAS21/ +*  *w1118; P{w[+mC]=Act5CGAL4}17bFO1 / +*  *w1118; UAS-CSAS[5] / +; P{w[+mC]=Act5CGAL4}17bFO1 / +*  *w1118; P{w[+mC]=Act5CGAL4}17bFO1 / UAS-CSAS[15]*  *w1118; UAS-CSAS[15] / +*  *w1118; P{w[+m*]=GAL4}repo / +*  *w1118; P{w[+m*]=GAL4}repo CSAS21/ CSAS21*  *w1118; P{w[+m*]=GAL4}repo / UAS-CSAS*  *y1 w* Mi{PT-GFSTF.0}paraMI08578-GFSTF.0 / w1118 P{GawB}elavC155*  *y1 w* Mi{PT-GFSTF.0}paraMI08578-GFSTF.0 / w1118 P{GawB}elavC155; DSiaTL22/ DSiaTL22*  *y1 w* Mi{PT-GFSTF.0}paraMI08578-GFSTF.0 / w1118 P{GawB}elavC155;*  *DSiaTL22/ DSiaTL22; UAS-DSiaT / +*  *w1118; DSiaTL22/ DSiaTL22*  *w* P{w[+mW.hs]=GawB}elav[C155], P{w[+mC]=UAS-mCD8::GFP.L} / +*  *w* P{w[+mW.hs]=GawB}elav[C155], P{w[+mC]=UAS-mCD8::GFP.L} / + ; DSiaTL22/ DSiaTL22*  *w* P{w[+mW.hs]=GawB}elav[C155], P{w[+mC]=UAS-mCD8::GFP.L} / + ; DSiaTL22/ +* | (Dubnau et al., 2001)  BDSC 458  BDSC 7415  BDSC 8751  BDSC 3954  BDSC 33807  BDSC 3953  BDSC 44528  BDSC 32203  BDSC 29954  BDSC 55820  BDSC 5146  BDSC 40436  BDSC 39157  VDRC 101396  BDSC 8849  (Auld et al., 1995; Ito et al., 1995)  (Dubnau et al., 2001)  (Islam et al., 2013)  (Islam et al., 2013)  (Repnikova et al., 2010)  (Ravenscroft et al., 2020)  (Islam et al., 2013)  (Islam et al., 2013)  (Repnikova et al., 2010)  This study  This study  This study  This study  _ _  Fig. 2  Fig. 2  Fig. 2  Fig. 2  Fig. 2  Fig. 2  Fig. 2, 3, 5-8  Fig. 2, 3, 5-8  Fig. 3, 5, 8  Fig. 3  Fig. 3  Fig. 3  Fig. 3  Fig. 3  Fig. 3  Fig. 3  Fig. 3  Fig. 3  Fig. 3  Fig. 3, 6  Fig. 3  Fig. 3  Fig. 3  Fig. 3  Fig. 3  Fig. 3  Fig. 3  Fig. 3  Fig. 3  Fig. 3  Fig. 3  Fig. 3  Fig. 3  Fig. 3    Fig. 3  Fig. 3  Fig. 3  Fig. 3  Fig. 3  Fig. 4  Fig. 4  Fig. 4  Fig. 4  Fig. 4  Fig. 4  Fig. 6  Fig. 6  Fig. 6  Fig. 7  Fig. 7  Fig. 7  Fig. 7  Fig. 7  Fig. 8  Fig. 8  Fig. 8  Fig. 9  Fig. 9  Fig. 9  Fig. 9  Fig. 9  Fig. 9  Fig. 9 |
