# Supplementary figures and images for: Glia-neuron coupling via a bipartite sialylation pathway promotes neural transmission and stress tolerance in Drosophila
Source: eLife journal article supplement (doi:10.7554/elife.78280), 2023-03-22

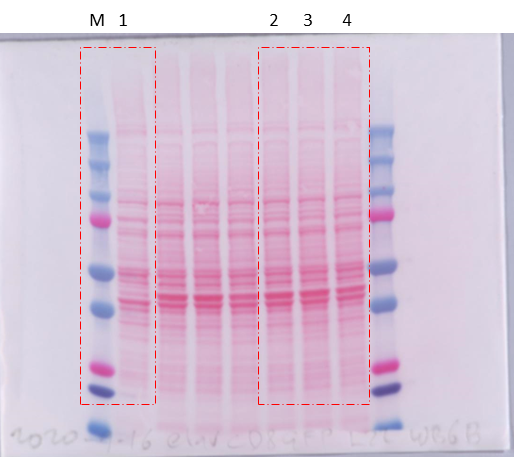

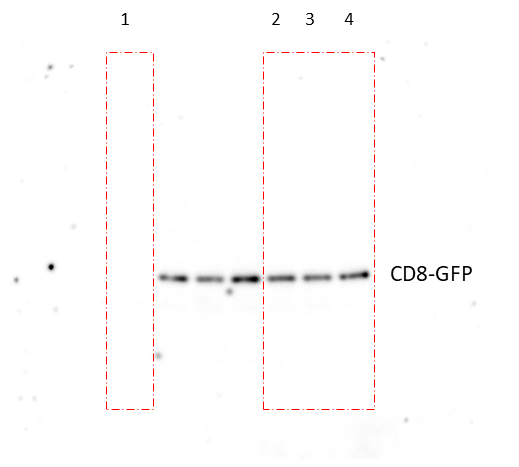

Supplement: supp [file Figure 9 -figure supplement 1C Source data - Labeled R1.docx]

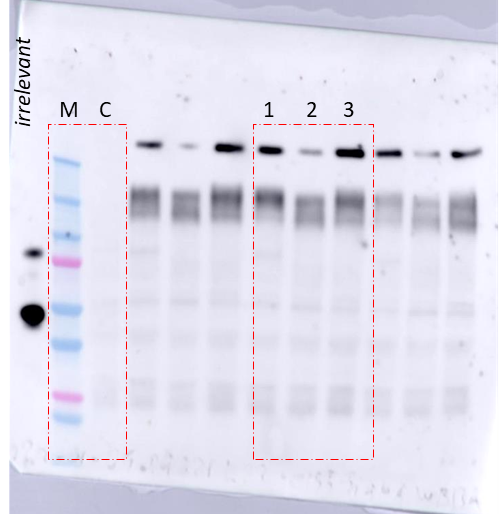


Para-GFP


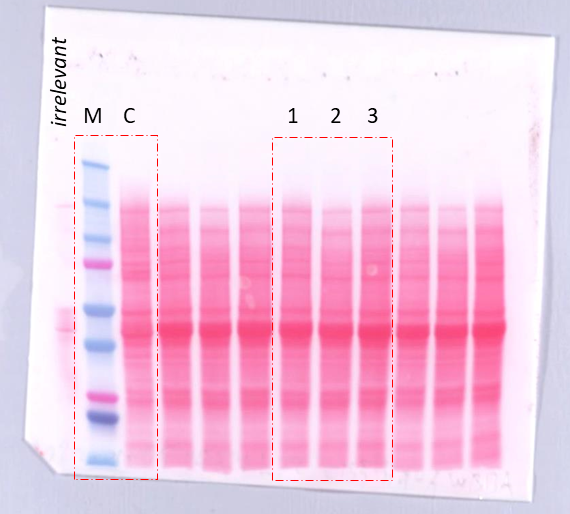

Supplement: supp [file Figure 9B - Source data - Labeled R1.docx]
